# Supplementary material for: Metal-free oxidation of sulfides by carbon nitride with visible light illumination at room temperature
Source: Royal Society of Chemistry journal article supplement (doi:10.1039/c2gc35148j), 2012-01-01
Supplement: c2gc35148j.pdf [file c2gc35148j.pdf]

## Electronic Supplementary Information

# **Metal-free oxidation of sulfides by carbon nitride with visible light illumination at room temperature**

Pengfei Zhang,<sup>a</sup> Yong Wang,<sup>a\*</sup> Haoran Li<sup>a\*</sup>, and Markus Antonietti<sup>b</sup>

<sup>a</sup> Department of Chemistry, Zhejiang University, Hangzhou 310027, P. R. China.

<sup>b</sup> Department of Colloid Chemistry, Max-Planck Institute of Colloids and Interfaces,  
Research Campus Golm, 14424 Potsdam, Germany.

\*Corresponding Author. Email: [chemwy@zju.edu.cn](mailto:chemwy@zju.edu.cn); [lihr@zju.edu.cn](mailto:lihr@zju.edu.cn).

## Figure and Table

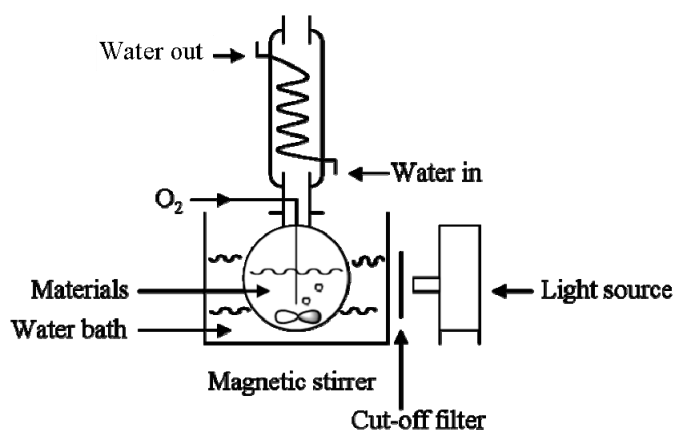

**Figure S1.** Self-assembly photo-reactor used in this study.

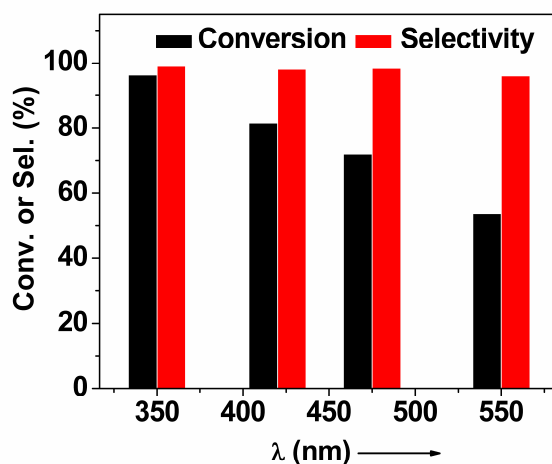

**Figure S2.** Wavelength dependence of the sulfide oxidation (conversion of methyl phenyl sulfide and selectivity for methyl phenyl sulfoxide) on mpg-C<sub>3</sub>N<sub>4</sub>/IBA system. Reaction conditions: methyl phenyl sulfide 1 mmol, mpg-C<sub>3</sub>N<sub>4</sub> 50 mg, IBA 2 mmol, CH<sub>3</sub>CN 3 mL, 25 °C, O<sub>2</sub> 1 atm, 4 h, a mercury lamp (150W) together with a cut-off filter (>350 nm, >420 nm, >475 nm, >550 nm) as visible light source.

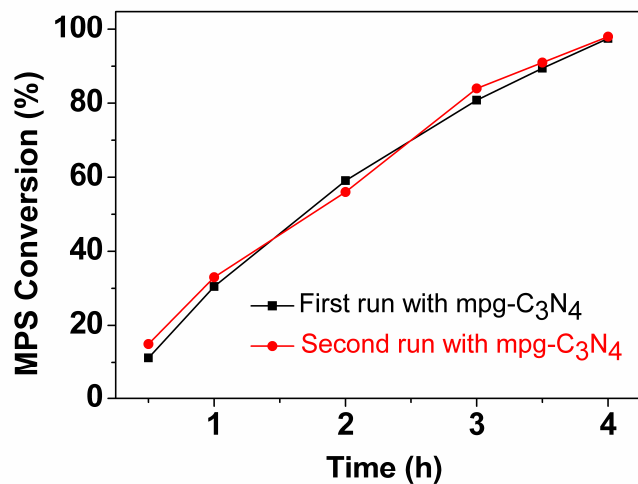

**Figure S3.** The conversion of MPS vs time plot for the oxidation of MPS by mpg-C<sub>3</sub>N<sub>4</sub> (fresh or reused)/IBA system. Reaction conditions: methyl phenyl sulfide 1 mmol, mpg-C<sub>3</sub>N<sub>4</sub> (fresh or reused) 50 mg, IBA 2 mmol, CH<sub>3</sub>CN 3 mL, 25 °C, 1 atm O<sub>2</sub>, visible light irradiation (>420nm).

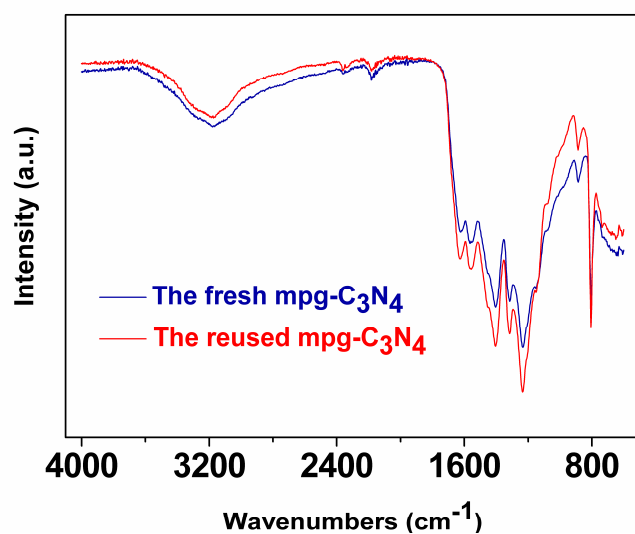

**Figure S4.** The FT-IR spectra of the fresh mpg-C<sub>3</sub>N<sub>4</sub> and reused one.

**Table S1.** The summary of these comparable experiments.

| Entry          | Substrate             | Product                 | Time  | Conv. (%) | Sel. (%) |
|----------------|-----------------------|-------------------------|-------|-----------|----------|
| 1 <sup>a</sup> | Methyl phenyl sulfide | Methyl phenyl sulfoxide | 4 h   | 8         | 98       |
| 2 <sup>b</sup> | Isobutyraldehyde      | Isobutyricacid          | 0.5 h | 14        | 96       |
| 3 <sup>c</sup> | Isobutyraldehyde      | Isobutyricacid          | 0.5 h | 70        | 98       |
| 4 <sup>d</sup> | Methyl phenyl sulfide | Methyl phenyl sulfoxide | 1 min | 24        | >99      |
| 5 <sup>e</sup> | Methyl phenyl sulfide | Methyl phenyl sulfoxide | 1 min | 24        | >99      |

<sup>a</sup> Reaction conditions: methyl phenyl sulfide 1 mmol, mpg-C<sub>3</sub>N<sub>4</sub> 50 mg, IBA 2 mmol, hydroquinone 0.5 mmol, CH<sub>3</sub>CN 3 mL, 25 °C, O<sub>2</sub> 1 atm, a mercury lamp (150W) together with a cut-off filter >420 nm as visible light source. <sup>b</sup> Reaction conditions: IBA 2 mmol, CH<sub>3</sub>CN 3 mL, 25 °C, O<sub>2</sub> 1 atm, a mercury lamp (150W) together with a cut-off filter >420 nm as visible light source. <sup>c</sup> Reaction conditions: IBA 2 mmol, mpg-C<sub>3</sub>N<sub>4</sub> 50 mg, CH<sub>3</sub>CN 3 mL, 25 °C, O<sub>2</sub> 1 atm, a mercury lamp (150W) together with a cut-off filter >420 nm as visible light source. <sup>d</sup> Reaction conditions: methyl phenyl sulfide 1 mmol, 18~20% peracetic acid solution 10 μL, CH<sub>3</sub>CN 3 mL, 25 °C, O<sub>2</sub> 1 atm, a mercury lamp (150W) together with a cut-off filter >420 nm as visible light source. <sup>e</sup> Reaction conditions: methyl phenyl sulfide 1 mmol, mpg-C<sub>3</sub>N<sub>4</sub> 50 mg, 18~20% peracetic acid solution 10 μL, CH<sub>3</sub>CN 3 mL, 25 °C, O<sub>2</sub> 1 atm, a mercury lamp (150W) together with a cut-off filter >420 nm as visible light source.

## Experimental Section

### Materials and general methods

Unless otherwise stated, all solvents and chemicals used were of commercially available analytical grade and used without further treatment. Methyl phenyl sulfide (99%), phenyl sulfide (>99%), methyl furfuryl sulfide (97%), diphenyl disulfide (99%), methyl-4-nitrophenyl sulfide (98%), 4-chlorophenyl methyl sulfide (98%), 4-bromophenyl methyl sulfide (98%), 4-(methylthio)anisole (98%), 4-methyl(thio)anisole (99%), 4-fluorophenyl methyl sulfide (98%), isobutyraldehyde (>99%) and 18~20% peracetic acid solution (AR) were purchased from Aladdin Chemistry Co., Ltd, China. Toluene (99.5%), acetonitrile (>99.5%), THF (>99%), CH<sub>3</sub>CH<sub>2</sub>OH (>99.5%) and CH<sub>2</sub>Cl<sub>2</sub> (>99.5%) were purchased from Shanghai Lingfeng Chemical Reagent Co., Ltd, China. Benzaldehyde (98.5%), 40% glyoxal solution, 37%-40% formaldehyde solution were purchased from Sinopharm Chemistry Co. Ltd. Hydroquinone (98.5%) was purchased from Nanjing Chemical Reagents Co. Ltd, China. The mpg-C<sub>3</sub>N<sub>4</sub> was synthesized as our previous reported method. (F. Goettmann, A. Fischer, M. Antonietti, A. Thomas, *Angew. Chem.*, 2006, 118, 4579; *Angew. Chem. Int. Ed.*, 2006, 45, 4467) The mercury lamp (150W) was provided by LOT-Oriel GmbH & CO. KG. Electron spin resonance (ESR) signals were recorded at room temperature (298 K) with a Bruker ESR A300 spectrometer. All GC experiments were carried out and recorded using a SHIMADZU GC-2010 with FID detector. The structure of products and by-products was identified using HP6890 GC/MS spectrometer by comparing retention times and fragmentation patterns with authentic samples.

### Typical procedure for the catalytic oxidation of methyl phenyl sulfide and other sulfides

In a typical oxidation, 1 mmol substrate, catalysts used as described in the manuscript and 3 mL solvent were added into a 10 mL round bottom glass-reactor, which was fitted with a magnetic stirrer and an O<sub>2</sub> inlet tube. The reaction was performed at 25 °C in a water bath with magnetic stirring. A stream of dioxygen was conducted into the reaction mixture and controlled by a flowmeter at a constant flow rate (10 mL min<sup>-1</sup>). A mercury

lamp (150W) together with a 420 nm cut-off filter was placed at a distance of ~10 cm from the reactor as a visible light source for the irradiation of this reaction system. To carry out the reaction in the dark, the glass-reactor was covered with aluminium foil. After completion of the reaction, methyl benzoate was added to the mixture as the internal standard and mpg-C<sub>3</sub>N<sub>4</sub> was filtered, then the reaction mixture was injected into the GC for analysis. Selectivities and conversions were calculated from the equations: Selectivity = [Sulfoxides]/[Consumed sulfides] × 100; Conversion = [Consumed sulfides]/[Initial sulfides] × 100, respectively.

### **Reusing of mpg-C<sub>3</sub>N<sub>4</sub>**

When the first oxidation finished, the reaction mixture was centrifuged for 10 min at 4000 r/min and then the liquid layer was siphoned out. The yellow solid was washed with 0.2 M NaOH, CH<sub>3</sub>CN and then centrifuged twice. The catalyst was dried in a vacuum oven at 70°C for 24 h. Finally, the recovered mpg-C<sub>3</sub>N<sub>4</sub> was used in the subsequent reaction.
